1 Original Article

# 2 Machine learning predicts metastatic 3 progression using novel differentially 4 expressed lncRNAs as potential markers in 5 pancreatic cancer

6 Hasan Alsharoh<sup>1\*</sup>

7 <sup>1</sup> “Iuliu Hațieganu” University of Medicine and Pharmacy, Cluj-Napoca, Romania

8 \*Corresponding author: [hasanalsharoh@gmail.com](mailto:hasanalsharoh@gmail.com)

## 9 **Abstract**

10 Pancreatic cancer (PC) is associated with high mortality overall. Recent literature has focused on  
11 investigating long noncoding RNAs (lncRNAs) in several cancers, but studies on their functions in PC are  
12 lacking. To identify significantly altered expression of lncRNA in PC, I collected information from The  
13 Cancer Genome Atlas (TCGA) and extracted RNA-sequencing (RNA-seq) transcriptomic profiles of  
14 pancreatic carcinomas and performed differential gene expression analysis. Out of 60,660 gene  
15 transcripts shared between 151 PC patients, I identified 38 lncRNAs that were significantly differentially  
16 expressed. To further investigate the functions of these genes, gene set enrichment analysis (GSEA) was  
17 performed on the population lncRNA panel. GSEA results revealed enrichment of several terms implicated  
18 in proliferation. To assess the contribution of these lncRNAs to metastatic progression, I used different  
19 ML algorithms, including logistic regression (LR), support vector machine (SVM), random forest classifier  
20 (RFC) and eXtreme Gradient Boosting Classifier (XGBC). Explicitly using significantly differentiated lncRNA  
21 genes and hyperparameter tuning, in addition to reducing bias through the synthetic minority  
22 oversampling technique, the accuracy of the ML models improved. Regardless, out of the four algorithms,

23 both SVM and RFC were able to predict metastatic progression with 76% accuracy. To the best of my  
24 knowledge, this is the first study of its kind to identify this lncRNA panel to differentiate between  
25 nonmetastatic PC and metastatic PC, with many novel lncRNAs previously unmapped to PC. The ML  
26 accuracy score reveals important involvement of the detected RNAs. Based on these findings, I suggest  
27 further investigations of this gene panel *in vitro* and *in vivo*, as they could be targeted for improved  
28 outcomes in PC patients, as well as assist in the diagnosis of metastatic progression based on RNA-seq  
29 data of primary pancreatic tumors.

30

## 31 1. Introduction

32 Pancreatic cancer (PC) is one of the deadliest cancers, with an overall five-year survival between 7.2  
33 and 10% according to the literature<sup>1,2</sup>. Evidence suggests that PC is often diagnosed in the late stages of  
34 tumorigenesis, likely contributing to its high mortality rate<sup>3</sup>. Recent literature has provided increasing  
35 evidence regarding the involvement of long noncoding RNAs (lncRNAs) in the development, invasiveness,  
36 angiogenic potential, chemotherapeutic resistance and metastatic capacity of PC<sup>4</sup>.

37 lncRNAs are RNA molecules characterized by having an arbitrary lower cutoff of 200 nucleotides that  
38 have been shown not to code for proteins post-transcriptionally<sup>4,5</sup>. lncRNAs have been shown to play  
39 complex roles in biological processes in various tissues, with possible implications in DNA repair, cellular  
40 proliferation, and human diseases, which made them a common target for recent literature to investigate  
41 in cancer<sup>6</sup>. lncRNAs have further been used as biomarkers for overcoming chemoresistance, as well as for  
42 the diagnosis of several cancers, including PC<sup>7-10</sup>.

43 Emerging research has been able to provide evidence regarding the use of lncRNAs for improved  
44 diagnostic accuracy, prognosis prediction, and treatment adjustment using various methods, including  
45 machine learning (ML) techniques<sup>8-10</sup>. Literature regarding the utilization of ML algorithms has been  
46 rapidly rising, with literature urging more rapid use of such algorithms in oncology to increase diagnostic  
47 accuracy or to further improve on the available algorithms<sup>11-13</sup>.

48 In this study, I aimed to investigate potential lncRNAs involved in the metastatic progression of PC  
49 based on RNA-sequencing (RNA-seq) data. To achieve this objective, I collected publicly available data  
50 from the cancer genome atlas (TCGA) for 172 patients and filtered the data according to predefined  
51 inclusion and exclusion criteria, which resulted in 151 PC records. PC records were further categorized  
52 according to their TNM staging, and tumor data were separated into tumors with metastatic activity  
53 (TMAs) and tumors without metastatic activity (TWAs). Using bioinformatics analytic techniques, I

54 identified 125 differentially expressed genes (DEGs) among 60,660 genes involved in this study, many of  
55 which were novel. I further assessed the functions of this global gene panel using a multiparametric  
56 approach.

57 Finally, I extracted lncRNA counts from the RNA-seq data from the PC population and further  
58 characterized 38 novel lncRNAs that were significantly differentially expressed. To further evaluate their  
59 involvement, I used 4 ML algorithms to predict and distinguish between TMAs and TWAs. These  
60 algorithms included multivariate logistic regression (LR), support vector machine (SVM), random forest  
61 classifier (RFC), and eXtreme Gradient Boosting Classifier (XGBC). I used several techniques to further  
62 reduce the bias within the included sample as described in the methodology.

63 Training and evaluation of the ML algorithms was performed by separating the dataset from the 38  
64 DEGs into a training set and a testing set to eventually evaluate the performance of each of the models.  
65 Out of all the ML algorithms, SVM and RFC were able to predict TMAs and TWAs with 76% accuracy using  
66 the 38 lncRNA data, suggesting important implications for the specified set of lncRNAs in PC. To the best  
67 of my knowledge, this is the first study to identify the involvement of this specific lncRNA panel in PC, with  
68 many novel lncRNAs lacking any studies performed on which.

69 The results of this research have important clinical implications, as the novelty of the lncRNAs requires  
70 further comprehensive validation and *in vitro* and *in vivo* investigations. The accuracy shown by the ML  
71 model suggests that these novel lncRNAs could be used as biomarkers and further targeted for improved  
72 diagnosis and outcome in PC patients.

## 73 2. Methods

### 74 2.1. Data acquisition

75 TCGA database was used for data collection and is available at <https://www.cancer.gov/tcga>.  
76 Exploration of TCGA-PAAD project data to acquire pancreatic RNA-seq data was performed on  
77 25/10/2023. File filters applied included a) Data Category: transcriptome profiling; b) Data Type: Gene  
78 Expression Quantification; c) Experimental strategy: RNA-Seq; d) Access: open. The case filters applied  
79 included the following: a) primary site: pancreas; b) project: TCGA-PAAD; and c) disease type: ductal and  
80 lobular neoplasms, adenomas and adenocarcinomas.

81 The inclusion criteria were that for each RNA-seq dataset to be of similar structure, for the predefined  
82 PC tumors mentioned in the filters, or regardless of age and gender. Primary tumors, regardless of  
83 metastatic stage, were also included. Exclusion criteria included defects in dataset structure, RNA-seq for  
84 tumor adjacent tissues, or those that had undergone prior therapy to a potential previous malignancy. I  
85 also excluded records with annotations specifying that tumor data were incorrectly labeled in terms of  
86 whether the tumor was neoplastic.

87 Further categorization was performed for the acquired data using Excel sheets. For TNM subgroup  
88 analysis, tumors with staging data were categorized into tumors with metastatic activity, which included  
89 those classified as M1, MX/M0 and N1 or above, and tumors without metastatic activity, which included  
90 those classified as M0N0. Acquired data were also filtered to include only lncRNA gene expression  
91 quantification. This subgrouping was performed prior to DGEA to assess differentially expressed genes  
92 between TWAs and TMAs.

## 93 2.2. Data analysis

94 Bioinformatics analysis was conducted on the data following matching the subjects to the study's  
95 inclusion and exclusion criteria. Python v3.11 (available at <https://www.python.org/>) was used in an  
96 Anaconda jupyter lab environment<sup>14,15</sup>. To restructure the dataset up for the study population RNA-seq  
97 datasets and to import the data into Python, the glob module was used<sup>16</sup>. Data manipulation was  
98 performed using pandas library v1.5.3<sup>17</sup>. Libraries such as numpy and scipy were also utilized for data  
99 processing<sup>18,19</sup>.

100 Differential gene expression analysis (DGEA) was performed using PyDESeq2, an R package  
101 implemented in Python that has been suggested to be reliable and comparable to the R package<sup>20</sup>. The  
102 DEGs were matched to gene symbols and further visualized using the matplotlib<sup>21</sup>, seaborn<sup>22</sup>, and  
103 sanbomics<sup>23</sup> packages. PyDeseq2 calculates the significance of genes using the Wald test, performs count  
104 normalization using the trimmed mean of M values (TMM), similar to DESeq2, and relies on the  
105 statsmodels library<sup>24,25</sup>. Using count normalization has been shown to have higher accuracy than TPM  
106 (transcripts per million) and FPKM (fragments per kilobase of transcript per million fragments mapped)<sup>26</sup>.  
107 A further description of the package is available elsewhere<sup>20</sup>. Significant differentiation after adjustment  
108 of p values was considered at  $p < 0.05$  and an absolute log<sub>2</sub>-fold change (log<sub>2</sub>FC) of  $> 0.5$ .

109 A heatmap of the DEGs was made through the matplotlib<sup>21</sup> package as well. Pearson's correlation  
110 coefficient was calculated and mapped for all gene transcript data.

## 111 2.3. Gene set and ontology enrichment analysis

112 Gene set enrichment analysis (GSEA) is a method of interpreting gene-wide expression profiles<sup>27</sup>.  
113 GSEA was performed using the GSEAPy v1.0.6 package, a Rust implementation of GSEA in python, used  
114 for performing computation of RNA-seq count data to evaluate predefined gene sets in association with  
115 different phenotypes. I ranked expression data using the prerank function available in the package. The

116 accuracy of this package has been previously proven, and the method to use it is described extensively  
117 elsewhere<sup>28</sup>.

118 Enrichment was performed for several gene collections from MSigDB available at ([https://www.gsea-  
120 msigdb.org/](https://www.gsea-<br/>119 msigdb.org/)) and miRTarBase 2017<sup>29</sup>. Gene sets and collections that were evaluated for enrichment were  
121 c2.cp.kegg.v2023.1.Hs.symbols, c3.mir.v2023.1.Hs.symbols, c3.tft.v2023.1.Hs.symbols,  
122 c4.cgn.v2023.1.Hs.symbols, c5.go.bp.v2023.1.Hs.symbols, c5.go.cc.v2023.1.Hs.symbols,  
123 c5.go.mf.v2023.1.Hs.symbols, c5.hpo.v2023.1.Hs.symbols, c6.all.v2023.1.Hs.symbols,  
124 h.all.v2023.1.Hs.symbols, and miRTarBase\_2017.

125 Gene Ontology (GO) is a detailed resource with annotations of gene and gene product functions<sup>30,31</sup>.  
126 It provides the potential to describe gene functions by assigning them to specific terms in which the genes  
127 are linked, detailing their relationships with each other. GO term enrichment was performed through  
128 GSEAPy, and the results were extracted through tools available in said package. GO graph was made after  
129 extracting enriched GO terms and the source identifiers were insert into AmiGO<sup>32</sup>.

130 The false discovery rate (FDR) was considered significant when  $FDR < 0.05$ . Visualization of GSEA results  
131 was performed using tools from GSEAPy. Data collected from GSEA results included terms, FDR,  
132 enrichment and negative enrichment scores, as well as matched genes. The minimum matching size for  
133 gene sets when performing GSEA for the global gene panel was set to 150. However, for the lncRNA panel,  
134 the minimum matching size was set to 3, as there were few enriched gene sets.

## 134 2.4. Machine learning models

135 I employed multivariate LR, SVM, RFC, and XGBC to predict metastatic risk for the population based  
136 on the lncRNA gene count data from TCGA. DEGs were extracted from DGEA for use as sole predictors of  
137 metastatic progression in the study population. Analysis of the models' accuracy was performed using  
138 packages from the scipy, scikit-learn, and matplotlib libraries.

139 To train the ML algorithms, data were categorized into a training set (70% of the data) and a testing  
140 set (30%). A random state number was set for all the implemented ML models to dictate a specific seed  
141 of randomness during the analysis to maintain reproducibility. For binary classification, TNM stage of IIa  
142 or below was designated “0” and considered the TWM for the ML algorithms, while TNM stage IIb or  
143 above was designated “1” and considered the TMA. The testing sets were hidden from the ML algorithms  
144 to evaluate the predictive capacity performance following model training.

145 Furthermore, hyperparameter tuning was performed to improve the predictive accuracy of the  
146 model. This was done through the GridSearchCV and BayesianSearchCV modules. Fivefold cross-validation  
147 was set as a parameter, and data regularization was done through L2 method. The inverse of the  
148 regularization strength (or penalty values) was set according to the optimal values found by the search  
149 modules specified above. To identify the best parameters, values were also tested over 50 iterations.  
150 Moreover, the synthetic minority oversampling technique (SMOTE) was performed to artificially increase  
151 TWM population numbers to reduce bias, which has proven to be a powerful tool in improving ML  
152 accuracy and addressing imbalanced samples<sup>33</sup>.

153 These methods of standardization were performed for all ML algorithms used. ML algorithms used  
154 were also provided by the scikit-learn and XGBoost libraries. All of the algorithms consist of supervised  
155 machine learning algorithms, and are commonly used for classifications of tumors<sup>34,35</sup>. Further, L2  
156 regularization has been considered to provide improved accuracy of the ML algorithms<sup>36</sup>.

## 157 3. Results

### 158 3.1. Primary characteristics of the study population

159 Of the 179 retrieved records, 23 were excluded for the following annotations: a) “This case is a  
160 neuroendocrine tumor and should not have been included in the PAAD study” (n = 8); b) “Per the PAAD



161 EPC, this tumor is a normal pancreas with atrophy” (n = 5); c) “Per the PAAD EPC, this tumor is an atrophic  
162 pancreas” (n = 3); d) “Per the PAAD EPC, this tumor is a noninvasive IPMN” (n = 1); e) “Per the PAAD EPC,  
163 this tumor is an acinar cell carcinoma” (n = 1); f) “Per the PAAD EPC, this tumor is a normal ampulla of  
164 Vater” (n = 1); g) “The PAAD EPC states that this case likely did not arise in the pancreas (ampullary)” (n =  
165 1); h) “Systemic treatment given to the prior/other malignancy” (n = 1); i) “Per the PAAD EPC, this tumor  
166 is an atrophic pancreas with a single focus of low-grade PanIN” (n = 2); “Samples identified in the sample  
167 sheet with a sample type of "Solid Tissue Normal" (from normal tissue adjacent to malignancy)” (

168 According to the flow diagram found in **Figure 1**. A total of 151 patient records were included. **Table**  
169 **1** summarizes the characteristics of the cohort. Notably, 115 records were classified as TMAs, while 36  
170 were classified as TWAs. Of the TMAs, 116 were diagnosed as TNM stage IIb, and 8 were diagnosed as  
171 stage III and IV. For the TWAs, 26 were at TNM stage IIa.

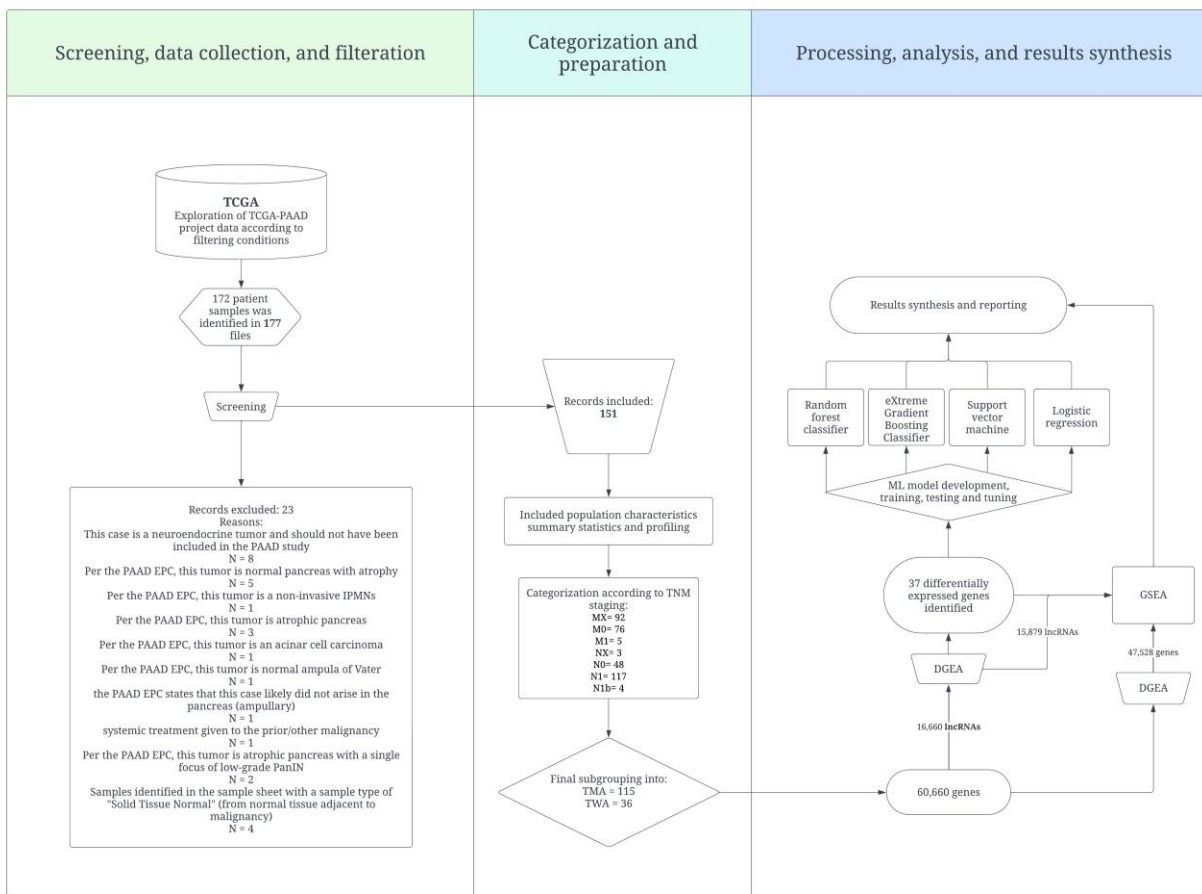

172  
 173 **Figure 1.** Flow diagram of the study. Created with Lucidchart, [www.lucidchart.com](http://www.lucidchart.com). TCGA: The Cancer  
 174 Genome Atlas; PAAD: Pancreatic adenocarcinoma; TMA: Tumor with metastatic activity; TWA: Tumor  
 175 without metastatic activity; DGEA: Differential gene expression analysis; GSEA: Gene set enrichment  
 176 analysis; ML: Machine learning.

| Table 1. Population primary characteristics |          |
|---------------------------------------------|----------|
| General Characteristics                     |          |
| Average age                                 | 64.62209 |
| Confidence                                  | 1.173259 |
| STDEV                                       | 10.92365 |
| Max age                                     | 88       |
| Min age                                     | 35       |
| Males                                       | 80       |
| females                                     | 70       |
| Pancreas, NOS                               | 14       |

|                                                                                                                                                                      |     |
|----------------------------------------------------------------------------------------------------------------------------------------------------------------------|-----|
| Head of pancreas                                                                                                                                                     | 112 |
| Body of pancreas                                                                                                                                                     | 11  |
| Tail of pancreas                                                                                                                                                     | 11  |
| Infiltrating duct carcinoma, NOS                                                                                                                                     | 133 |
| Adenocarcinoma, NOS                                                                                                                                                  | 16  |
| <b>Included patient records characteristics</b>                                                                                                                      |     |
| TMA                                                                                                                                                                  | 115 |
| TWA                                                                                                                                                                  | 36  |
| MX                                                                                                                                                                   | 78  |
| M0                                                                                                                                                                   | 68  |
| M1                                                                                                                                                                   | 5   |
| NX                                                                                                                                                                   | 1   |
| N0                                                                                                                                                                   | 39  |
| N1                                                                                                                                                                   | 108 |
| N1b                                                                                                                                                                  | 3   |
| <b>Staging</b>                                                                                                                                                       |     |
| I                                                                                                                                                                    | 0   |
| III                                                                                                                                                                  | 3   |
| IIb                                                                                                                                                                  | 106 |
| IIa                                                                                                                                                                  | 23  |
| IV                                                                                                                                                                   | 5   |
| <b>STDEV</b> ; Standard deviation; <b>NOS</b> : Not otherwise specified; <b>TMA</b> : Tumor with metastatic activity; <b>TWA</b> : Tumor without metastatic activity |     |

177

178 The age range of the total patient sample was between 35 and 88 years old (mean = 64.66 ± 10.91).

179 Ninety-four were males, and 78 were females. When reported, 143 had infiltrating duct carcinoma, and

180 16 had adenocarcinoma as the primary diagnosis. Eight had neuroendocrine tumors but were excluded.

181 Seventeen pancreatic tumors had no specified location, 125 were pancreatic head lesions, 15 were

182 pancreatic body lesions, and 13 were pancreatic tail lesions.

183

184 The RNA-seq data included 60,660 gene expression profiles for each of the included patient and

185 control samples. Transcriptomic profiling was performed for the same genes in all patient samples. Of the

186 available transcripts, 16,901 were lncRNAs. After removing lncRNAs with 0 values among all patients,  
187 15,879 lncRNAs remained. All details regarding the included samples are available in **Supplementary**  
188 **Material 1**.

### 189 3.2. DGEA and GSEA of all gene transcripts

190 A total of 60,660 gene transcripts were filtered following PyDESeq2 analysis, and unavailable values  
191 were dropped, resulting in 47,528 transcripts. DGEA revealed 125 differentially expressed genes, as shown  
192 in **Table 2**, and the top differentially expressed genes are shown in **Figure 2**. Notably, ADH7, SERPINB13,  
193 MIR205HG, NTS, and LINC01300 were the most downregulated genes, with log<sub>2</sub>FC values of -3.42295, -  
194 3.4189, -3.12513, -3.02808, and -2.72096, respectively. The most upregulated genes were PAX7,  
195 AC010789.1, TMPRSS15, DEFA6, and DEFA5 and had log<sub>2</sub>FC values of 3.149596, 3.506053, 3.538356,  
196 3.594891, and 4.800701, respectively.

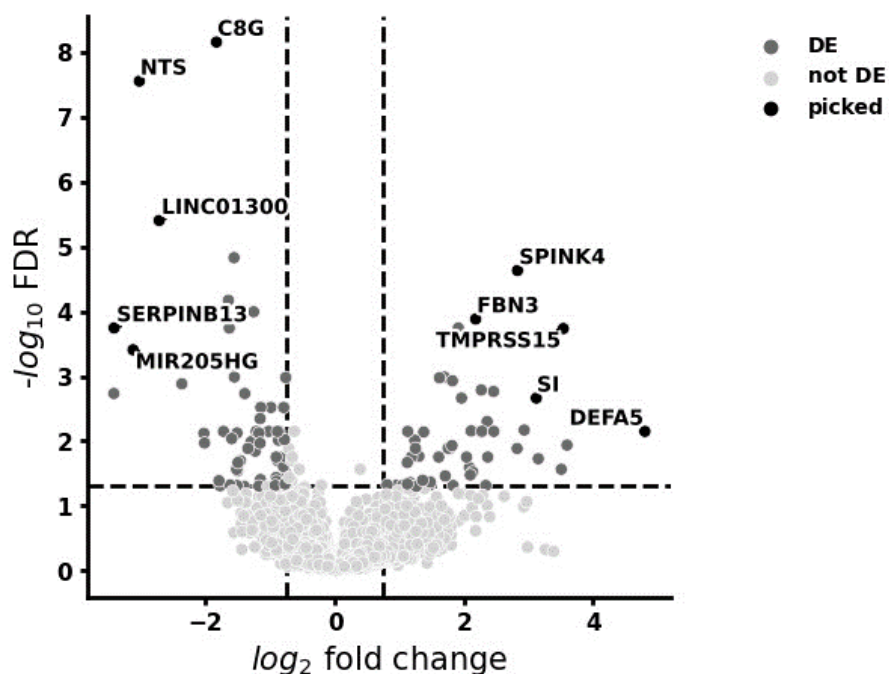

197  
198 **Figure 2.** Differentially expressed genes in PC. Absolute log<sub>2</sub>FC>0.5 and adjusted p value<0.05 were  
199 considered as the significance thresholds.

| <b>Table 2. Differentially expressed genes found in the global gene sample</b> |            |                |          |                  |
|--------------------------------------------------------------------------------|------------|----------------|----------|------------------|
| ENSEMBL ID                                                                     | Symbol     | log2FoldChange | Rank     | Adjusted p-value |
| ENSG00000196344                                                                | ADH7       | -3.42295       | -4.80123 | 0.001852         |
| ENSG00000197641                                                                | SERPINB13  | -3.4189        | -5.41464 | 0.00018          |
| ENSG00000230937                                                                | MIR205HG   | -3.12513       | -5.2119  | 0.000392         |
| ENSG00000133636                                                                | NTS        | -3.02808       | -7.0417  | 2.79E-08         |
| ENSG00000253595                                                                | LINC01300  | -2.72096       | -6.20744 | 3.95E-06         |
| ENSG00000196427                                                                | NBPF4      | -2.37012       | -4.89494 | 0.001312         |
| ENSG00000122133                                                                | PAEP       | -2.21459       | -5.13911 | 0.00054          |
| ENSG00000137975                                                                | CLCA2      | -2.02911       | -4.3518  | 0.007622         |
| ENSG00000241794                                                                | SPRR2A     | -2.01833       | -4.2515  | 0.010747         |
| ENSG00000176919                                                                | C8G        | -1.83355       | -7.32595 | 6.96E-09         |
| ENSG00000285722                                                                | AC207130.1 | -1.7953        | -3.80052 | 0.04115          |
| ENSG00000162951                                                                | LRRTM1     | -1.77758       | -3.70984 | 0.049095         |
| ENSG00000075673                                                                | ATP12A     | -1.72492       | -4.41944 | 0.007122         |
| ENSG00000273143                                                                | DUSP5-DT   | -1.64896       | -5.64949 | 6.75E-05         |
| ENSG00000230916                                                                | MTCO1P53   | -1.63588       | -5.3881  | 0.000181         |
| ENSG00000170477                                                                | KRT4       | -1.62228       | -3.73908 | 0.047978         |
| ENSG00000258010                                                                | AC016705.1 | -1.59722       | -4.30607 | 0.009204         |
| ENSG00000086570                                                                | FAT2       | -1.58451       | -5.08612 | 0.00067          |

|                 |           |          |          |          |
|-----------------|-----------|----------|----------|----------|
| ENSG00000214711 | CAPN14    | -1.56223 | -5.95983 | 1.48E-05 |
| ENSG00000101197 | BIRC7     | -1.55642 | -4.98114 | 0.001031 |
| ENSG00000110680 | CALCA     | -1.52146 | -3.93287 | 0.02735  |
| ENSG00000130822 | PNCK      | -1.51657 | -3.71624 | 0.04873  |
| ENSG00000166558 | SLC38A8   | -1.51515 | -4.3587  | 0.007531 |
| ENSG00000015592 | STMN4     | -1.50729 | -3.91404 | 0.02896  |
| ENSG00000205426 | KRT81     | -1.50078 | -4.00887 | 0.021539 |
| ENSG00000154975 | CA10      | -1.46245 | -4.02791 | 0.020145 |
| ENSG00000016602 | CLCA4     | -1.40473 | -3.69932 | 0.049966 |
| ENSG00000124466 | LYPD3     | -1.39559 | -4.79298 | 0.001855 |
| ENSG00000228705 | LINC00659 | -1.34601 | -4.17454 | 0.013082 |
| ENSG00000134339 | SAA2      | -1.29552 | -4.26585 | 0.010255 |
| ENSG00000108786 | HSD17B1   | -1.2613  | -6.32798 | 2.43E-06 |
| ENSG00000121552 | CSTA      | -1.25807 | -5.5557  | 0.000101 |
| ENSG00000116014 | KISS1R    | -1.23273 | -4.14973 | 0.014369 |
| ENSG00000204882 | GPR20     | -1.21769 | -4.39539 | 0.007122 |
| ENSG00000184564 | SLITRK6   | -1.17582 | -3.70529 | 0.049585 |
| ENSG00000253522 | MIR3142HG | -1.17478 | -4.3625  | 0.007531 |
| ENSG00000255129 | TTC12-DT  | -1.15786 | -4.24636 | 0.01081  |
| ENSG00000233828 | MIR4280HG | -1.15767 | -4.56131 | 0.004522 |

|                 |            |          |          |          |
|-----------------|------------|----------|----------|----------|
| ENSG00000132746 | ALDH3B2    | -1.15254 | -3.81836 | 0.039435 |
| ENSG00000181652 | ATG9B      | -1.14738 | -4.6546  | 0.003036 |
| ENSG00000115008 | IL1A       | -1.12498 | -3.77886 | 0.043629 |
| ENSG00000177627 | C12orf54   | -1.02545 | -4.3938  | 0.007122 |
| ENSG00000180739 | S1PR5      | -0.99067 | -4.65304 | 0.003036 |
| ENSG00000272948 | AP001412.1 | -0.92415 | -3.72701 | 0.048613 |
| ENSG00000167971 | CASKIN1    | -0.90985 | -3.8412  | 0.036673 |
| ENSG00000278743 | AC087239.1 | -0.90938 | -4.0769  | 0.01772  |
| ENSG00000175189 | INHBC      | -0.90458 | -3.79432 | 0.041787 |
| ENSG00000272906 | AL353708.3 | -0.88897 | -4.40552 | 0.007122 |
| ENSG00000178445 | GLDC       | -0.88519 | -4.03342 | 0.020145 |
| ENSG00000268041 | ERFL       | -0.8732  | -4.28133 | 0.009738 |
| ENSG00000254266 | PKIA-AS1   | -0.86706 | -4.38841 | 0.007122 |
| ENSG00000117407 | ARTN       | -0.8143  | -4.08225 | 0.01772  |
| ENSG00000204963 | PCDHA7     | -0.79643 | -3.97143 | 0.024672 |
| ENSG00000286810 | AL513128.3 | -0.793   | -4.66358 | 0.003036 |
| ENSG00000268403 | AC132192.2 | -0.78124 | -4.29421 | 0.00953  |
| ENSG00000277218 | AL139123.1 | -0.77132 | -3.75731 | 0.046252 |
| ENSG00000102466 | FGF14      | -0.76382 | -3.83777 | 0.036813 |
| ENSG00000100162 | CENPM      | -0.76299 | -3.89051 | 0.031239 |

|                 |             |          |          |          |
|-----------------|-------------|----------|----------|----------|
| ENSG00000232573 | RPL3P4      | -0.76122 | -4.96717 | 0.00105  |
| ENSG00000237181 | PRKAR1B-AS1 | -0.75848 | -4.09162 | 0.017711 |
| ENSG00000233901 | LINC01503   | -0.73675 | -3.75264 | 0.046672 |
| ENSG00000267710 | EDDM13      | -0.71591 | -4.18507 | 0.013075 |
| ENSG00000196420 | S100A5      | -0.70536 | -3.75049 | 0.046672 |
| ENSG00000287575 | AL390755.3  | -0.70456 | -3.84387 | 0.036651 |
| ENSG00000227256 | MIS18A-AS1  | -0.66983 | -3.80296 | 0.041147 |
| ENSG00000263412 | NFE2L1-DT   | -0.66855 | -4.03071 | 0.020145 |
| ENSG00000158292 | GPR153      | -0.6636  | -3.71762 | 0.04873  |
| ENSG00000270426 | AC099343.2  | -0.66056 | -4.09624 | 0.017609 |
| ENSG00000269961 | ERBIN-DT    | -0.62896 | -4.4063  | 0.007122 |
| ENSG00000270659 | AC079610.1  | -0.55231 | -3.93098 | 0.02735  |
| ENSG00000109684 | CLNK        | 0.811049 | 3.743661 | 0.047532 |
| ENSG00000007171 | NOS2        | 0.9501   | 3.727137 | 0.048613 |
| ENSG00000168004 | PLAAT5      | 1.046959 | 3.713844 | 0.04873  |
| ENSG00000217275 |             | 1.103167 | 3.945237 | 0.026898 |
| ENSG00000244675 | AC108676.1  | 1.121008 | 4.006455 | 0.021539 |
| ENSG00000249574 | AC226118.1  | 1.122255 | 3.758216 | 0.046252 |
| ENSG00000165186 | PTCHD1      | 1.127601 | 4.425499 | 0.007122 |
| ENSG00000204710 | SPDYC       | 1.164409 | 3.774913 | 0.043911 |



|                 |            |          |          |          |
|-----------------|------------|----------|----------|----------|
| ENSG00000133317 | LGALS12    | 1.185546 | 4.074521 | 0.01772  |
| ENSG00000110195 | FOLR1      | 1.236702 | 4.28444  | 0.009738 |
| ENSG00000179766 | ATP8B5P    | 1.248188 | 4.18952  | 0.013025 |
| ENSG00000243910 | TUBA4B     | 1.26142  | 3.699883 | 0.049966 |
| ENSG00000231106 | LINC01436  | 1.269281 | 3.713818 | 0.04873  |
| ENSG00000079841 | RIMS1      | 1.301664 | 4.104695 | 0.017223 |
| ENSG00000254872 | LINC02688  | 1.359219 | 3.809804 | 0.040421 |
| ENSG00000077935 | SMC1B      | 1.37522  | 4.3749   | 0.007278 |
| ENSG00000047936 | ROS1       | 1.462054 | 3.733667 | 0.048592 |
| ENSG00000250337 | PURPL      | 1.478326 | 3.784362 | 0.043081 |
| ENSG00000211951 | IGHV2-26   | 1.607862 | 4.072645 | 0.01772  |
| ENSG00000113722 | CDX1       | 1.619806 | 4.955568 | 0.001058 |
| ENSG00000261409 |            | 1.673178 | 4.087027 | 0.01772  |
| ENSG00000095627 | TDRD1      | 1.695616 | 4.99184  | 0.001031 |
| ENSG00000275874 | PICSAR     | 1.709471 | 3.859728 | 0.034709 |
| ENSG00000138823 | MTTP       | 1.75384  | 4.194027 | 0.012975 |
| ENSG00000109182 | CWH43      | 1.779912 | 4.179552 | 0.013082 |
| ENSG00000286734 | AC133530.1 | 1.81407  | 4.219397 | 0.011788 |
| ENSG00000159251 | ACTC1      | 1.820261 | 4.924839 | 0.00118  |
| ENSG00000248635 |            | 1.82577  | 4.389008 | 0.007122 |

|                 |           |          |          |          |
|-----------------|-----------|----------|----------|----------|
| ENSG00000124237 | C20orf85  | 1.830513 | 3.714347 | 0.04873  |
| ENSG00000070019 | GUCY2C    | 1.911694 | 5.38153  | 0.000181 |
| ENSG00000185105 | MYADML2   | 1.961126 | 4.745671 | 0.002179 |
| ENSG00000179914 | ITLN1     | 2.039036 | 4.069503 | 0.01773  |
| ENSG00000130700 | GATA5     | 2.082396 | 3.959788 | 0.025605 |
| ENSG00000264404 | LINC02675 | 2.097143 | 3.871155 | 0.03347  |
| ENSG00000189052 | CGB5      | 2.11069  | 4.450157 | 0.006997 |
| ENSG00000198788 | MUC2      | 2.134906 | 3.90208  | 0.030102 |
| ENSG00000142449 | FBN3      | 2.180393 | 5.489955 | 0.000131 |
| ENSG00000250376 |           | 2.232802 | 4.650635 | 0.003036 |
| ENSG00000151365 | THRSP     | 2.253533 | 4.419036 | 0.007122 |
| ENSG00000115850 | LCT       | 2.267295 | 4.842754 | 0.001634 |
| ENSG00000198842 | STYXL2    | 2.278382 | 4.441746 | 0.007079 |
| ENSG00000205076 | LGALS7    | 2.337392 | 3.713775 | 0.04873  |
| ENSG00000166869 | CHP2      | 2.35771  | 4.533106 | 0.005018 |
| ENSG00000113196 | HAND1     | 2.366848 | 4.07674  | 0.01772  |
| ENSG00000091138 | SLC26A3   | 2.457377 | 4.823641 | 0.001724 |
| ENSG00000282122 | IGHV7-4-1 | 2.461323 | 4.384127 | 0.007122 |
| ENSG00000016490 | CLCA1     | 2.822016 | 4.177146 | 0.013082 |
| ENSG00000122711 | SPINK4    | 2.828123 | 5.854698 | 2.34E-05 |

|                 |            |          |          |          |
|-----------------|------------|----------|----------|----------|
| ENSG00000228674 | PPIAP59    | 2.932048 | 4.462678 | 0.006788 |
| ENSG00000090402 | SI         | 3.119419 | 4.749043 | 0.002179 |
| ENSG0000009709  | PAX7       | 3.149596 | 4.052701 | 0.018812 |
| ENSG00000224817 | AC010789.1 | 3.506053 | 3.93045  | 0.02735  |
| ENSG00000154646 | TMPRSS15   | 3.538356 | 5.363727 | 0.000184 |
| ENSG00000164822 | DEFA6      | 3.594891 | 4.227086 | 0.011582 |
| ENSG00000164816 | DEFA5      | 4.800701 | 4.413106 | 0.007122 |

200

201 GSEA was subsequently performed, with libraries investigated available in **Supplementary**  
202 **Materials 2**. There were many gene sets enriched with the genes, as many genes were included in the  
203 study's gene panel. Notably, several GO terms were enriched, as well as some terms from miRTarBase  
204 2017, as shown in **Figure 3 A and B**. FDR values were significant for the enriched terms (FDR<0.01).

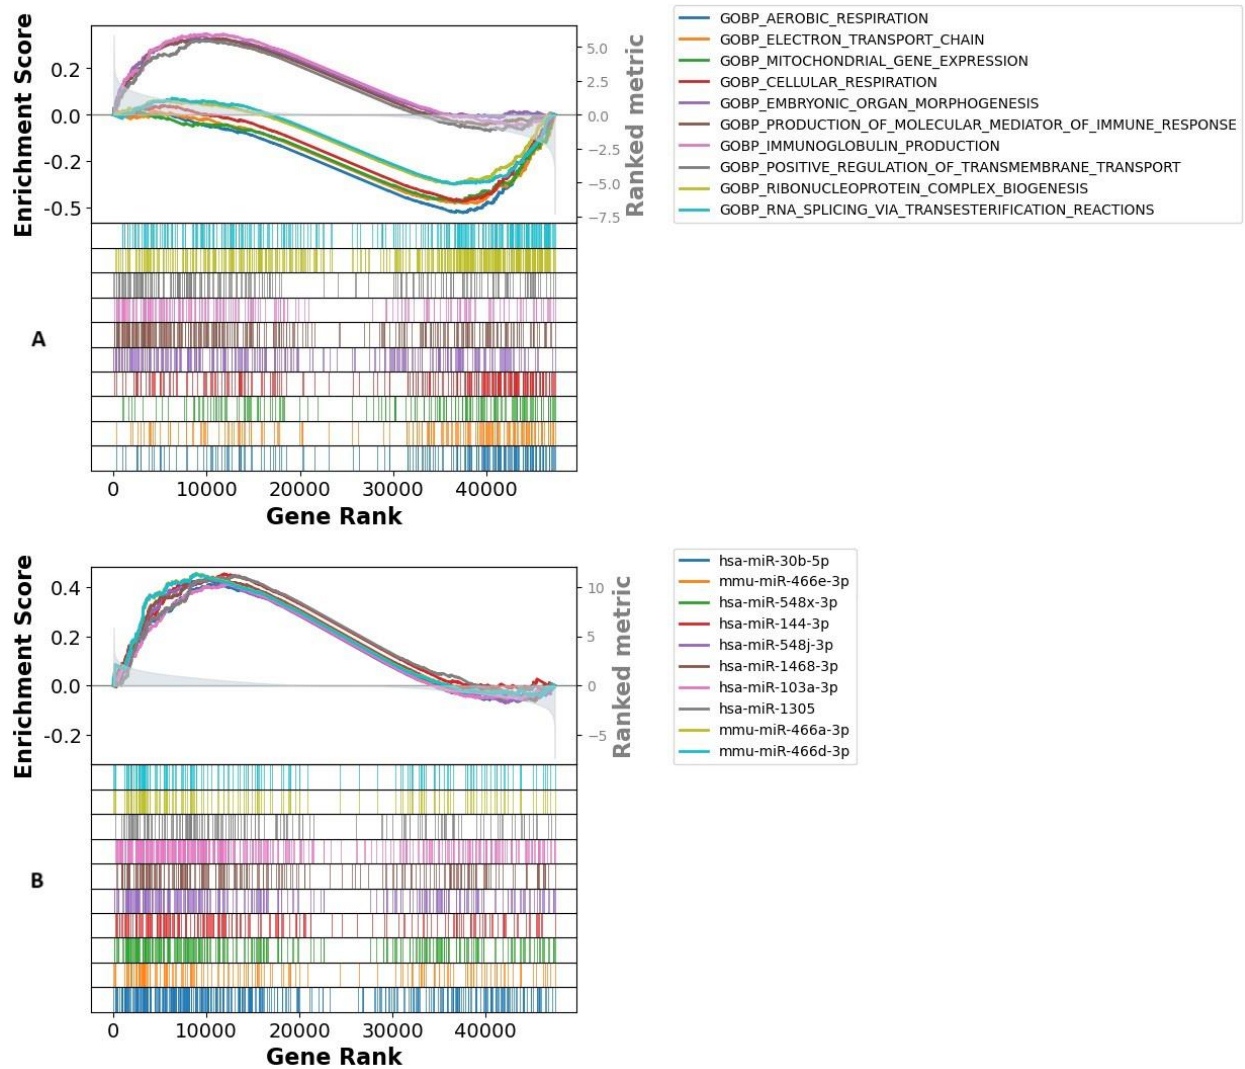

205

206

**Fig.3 A.** GOBP (GO biological process) term enrichment. Upregulated genes had a lower rank, and

207

downregulated genes had a higher rank. The enrichment score correlates with the number of genes

208

from the gene panel enriching the gene set with significantly differentiated expression. More genes

209

enriching this term are downregulated in this study due to the enrichment score reaching -0.5 since

210

these genes have a higher density of higher ranked genes. **B.** miRTarBase\_2017 term enrichment.

211

Upregulated genes had a lower rank, and downregulated genes had a higher rank. The enrichment score

212

correlates with the number of genes from the gene panel enriching the gene set with significantly

213 differentiated expression. Here, the gene set was more enriched with the upregulated genes from the  
214 gene panel.

### 215 3.3. lncRNA DGEA, correlations, and GSEA

216 Further subgroup analysis was performed for lncRNAs in PC, which returned 16,901 gene expression  
217 values, for which PyDeseq2 was also used to analyze DEGs. Dropping the 0-sum, duplicate, and unavailable  
218 values retrieved 15,568 lncRNAs. Of the lncRNA panel, 38 lncRNAs were significantly differentially  
219 expressed (shown in **Figure 4**).

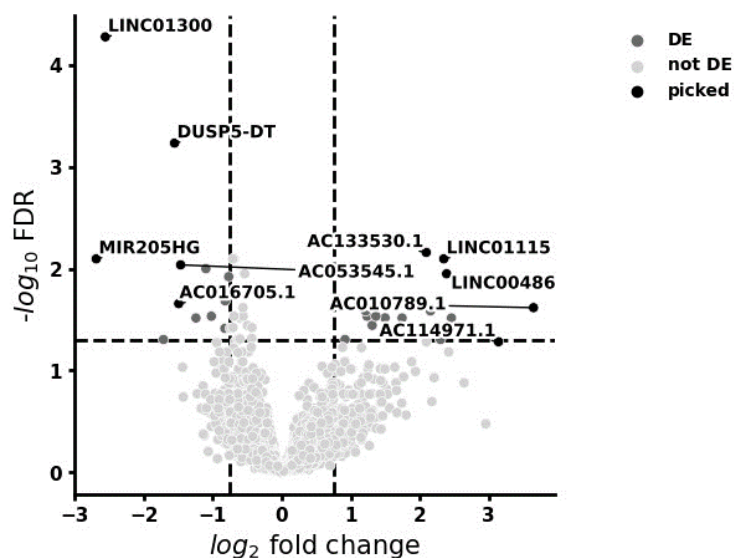

220  
221 **Figure 4.** Differentially expressed lncRNA. Absolute log<sub>2</sub>FC>0.5 and adjusted p value<0.05 were  
222 considered as the significance thresholds.

223 Interestingly, the most downregulated genes were LINC01300, DUSP5-DT, AL513128.3,  
224 MIR205HG, and AC132192.2, with Log<sub>2</sub>FC values of -2.55682, -1.55378, -0.70877, -2.68894, and -0.68868,  
225 respectively. The most upregulated genes were AC010789.1, LINC00486, ENSG00000261409 (referred to  
226 as RF00019), LINC01115, and AC133530.1, with log<sub>2</sub>FC values of 2.154221, 1.214608, 3.647081, 1.705921,  
227 and 2.388161, respectively. Results of DGEA on the lncRNAs are shown in **Table 3**.

| <b>Table 3. DGEA of lncRNAs in PC.</b> |            |                |          |                  |
|----------------------------------------|------------|----------------|----------|------------------|
| ENSEMBL ID                             | symbol     | log2FoldChange | Rank     | Adjusted p-value |
| ENSG00000253595                        | LINC01300  | -2.55682       | -5.79229 | 5.25E-05         |
| ENSG00000273143                        | DUSP5-DT   | -1.55378       | -5.24801 | 0.000582         |
| ENSG00000286810                        | AL513128.3 | -0.70877       | -4.56204 | 0.007988         |
| ENSG00000230937                        | MIR205HG   | -2.68894       | -4.5098  | 0.007988         |
| ENSG00000268403                        | AC132192.2 | -0.68868       | -4.48214 | 0.007988         |
| ENSG00000287692                        | AC053545.1 | -1.46588       | -4.42416 | 0.009158         |
| ENSG00000233828                        | MIR4280HG  | -1.09978       | -4.37975 | 0.00999          |
| ENSG00000269961                        | ERBIN-DT   | -0.53815       | -4.31064 | 0.011198         |
| ENSG00000272906                        | AL353708.3 | -0.76963       | -4.27697 | 0.011946         |
| ENSG00000254266                        | PKIA-AS1   | -0.82096       | -4.11833 | 0.020627         |
| ENSG00000258010                        | AC016705.1 | -1.49399       | -4.08738 | 0.022009         |
| ENSG00000270426                        | AC099343.2 | -0.56239       | -4.03685 | 0.024114         |
| ENSG00000253522                        | MIR3142HG  | -1.02076       | -3.95022 | 0.029262         |
| ENSG00000263412                        | NFE2L1-DT  | -0.5603        | -3.93248 | 0.029262         |
| ENSG00000277218                        | AL139123.1 | -0.69149       | -3.90873 | 0.029262         |
| ENSG00000227256                        | MIS18A-AS1 | -0.61208       | -3.88033 | 0.03036          |
| ENSG00000228705                        | LINC00659  | -1.24398       | -3.8544  | 0.030461         |
| ENSG00000285886                        | AC211476.6 | -0.70691       | -3.76746 | 0.037816         |
| ENSG00000272948                        | AP001412.1 | -0.82452       | -3.75478 | 0.038514         |
| ENSG00000278743                        | AC087239.1 | -0.74556       | -3.74815 | 0.038514         |
| ENSG00000285763                        | AL358777.1 | -0.60768       | -3.67036 | 0.048983         |
| ENSG00000276791                        | AC092117.1 | -0.63072       | -3.66641 | 0.048983         |
| ENSG00000285722                        | AC207130.1 | -1.71493       | -3.65656 | 0.049573         |
| ENSG00000265933                        | LINC00668  | 2.298864       | 3.643841 | 0.049573         |
| ENSG00000268388                        | FENDRR     | 0.916365       | 3.644596 | 0.049573         |
| ENSG00000231106                        | LINC01436  | 1.30986        | 3.795489 | 0.035968         |
| ENSG00000248740                        | LINC02428  | 2.458109       | 3.852876 | 0.030461         |
| ENSG00000275874                        | PICRAR     | 1.742661       | 3.862257 | 0.030461         |
| ENSG00000250337                        | PURPL      | 1.495827       | 3.887343 | 0.03036          |
| ENSG00000228709                        | LINC02575  | 1.235504       | 3.908659 | 0.029262         |
| ENSG00000254872                        | LINC02688  | 1.363374       | 3.920829 | 0.029262         |
| ENSG00000264404                        | LINC02675  | 2.154221       | 3.993045 | 0.025979         |
| ENSG00000249574                        | AC226118.1 | 1.214608       | 3.998806 | 0.025979         |
| ENSG00000224817                        | AC010789.1 | 3.647081       | 4.04573  | 0.024114         |
| ENSG00000261409                        |            | 1.705921       | 4.224935 | 0.013912         |
| ENSG00000230876                        | LINC00486  | 2.388161       | 4.312419 | 0.011198         |
| ENSG00000237667                        | LINC01115  | 2.347361       | 4.509832 | 0.007988         |
| ENSG00000286734                        | AC133530.1 | 2.092716       | 4.689599 | 0.006905         |

229            Moreover, since the number of DEGs was feasible, to further visualize the relationship between  
230 these lncRNAs, each was correlated to the rest, and Pearson's correlation coefficients for all the lncRNAs  
231 were extracted. The results are visualized in **Figure 5**. A table of all Pearson's correlation coefficients can  
232 be found in **Supplementary Material 3**.

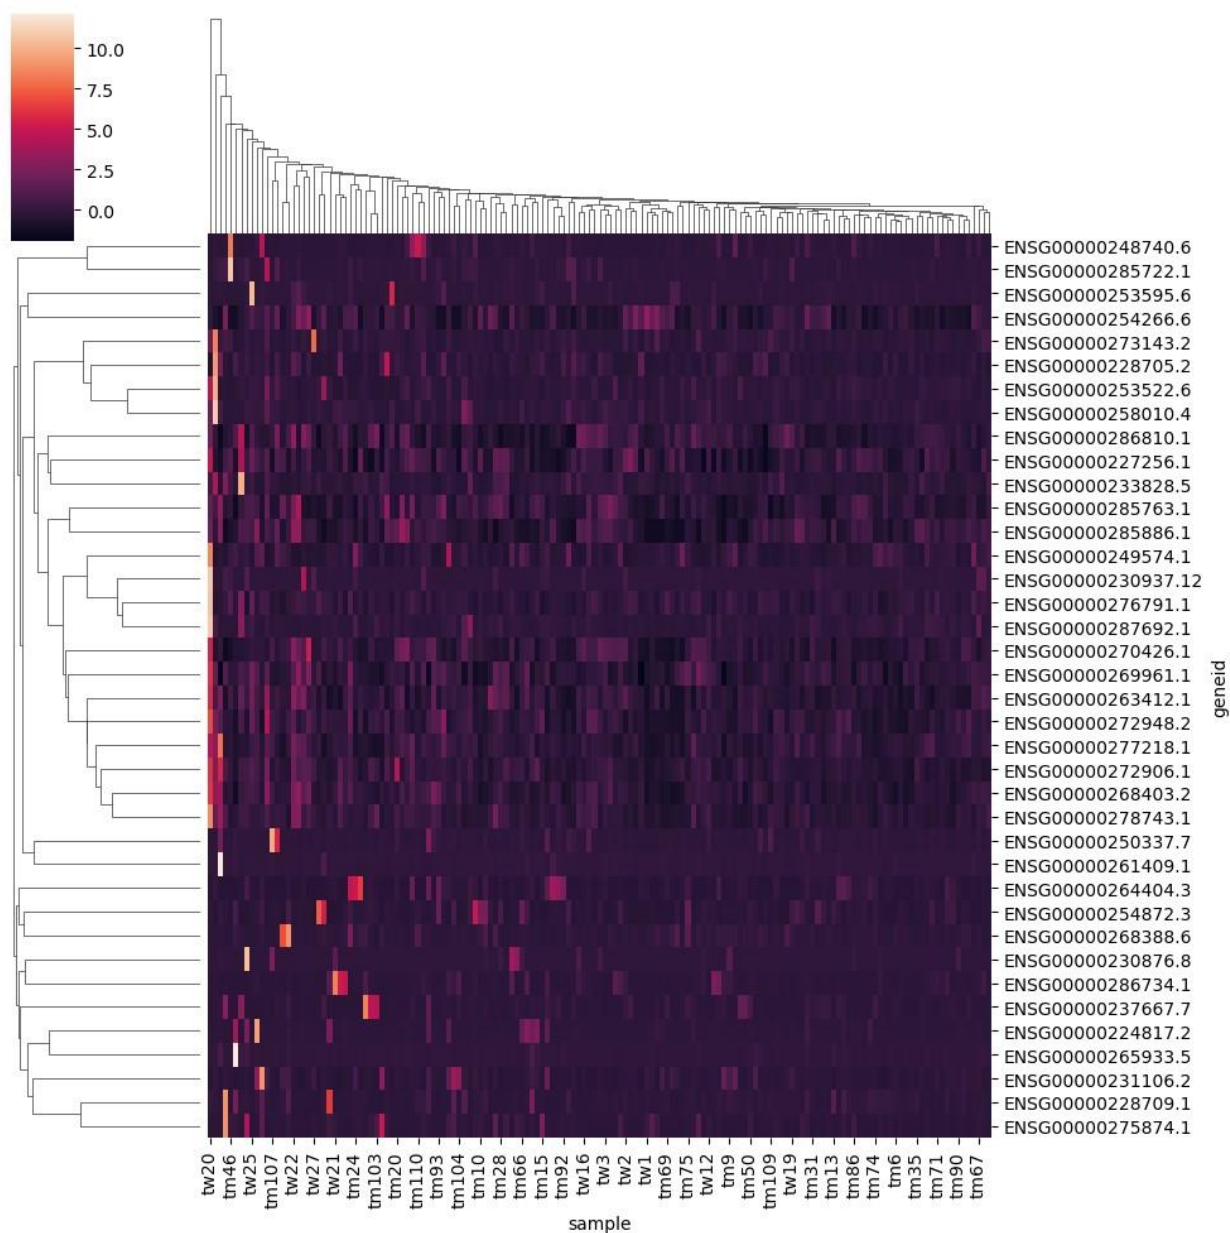

233



234 **Figure 5.** Hierarchical clustering heatmap of lncRNAs amongst the sample population. The color  
235 gradient in the legend refers to Pearson's correlation coefficient. The dendrogram linkage is based on  
236 the correlation strength. Geneid: ENSEMBL ID. tw: TWAs; tm: TMAs.

237 GSEA and GO analyses were subsequently performed for all the lncRNA data. Due to the lack of  
238 studies on the genes of these transcripts, there was no significant enrichment in most databases. Notably,  
239 a few terms were enriched from the MSigDB c3.tft.v2023.1.Hs.symbols collection, which is focused on  
240 transcription factors. The results of the term enrichment for the top 10 terms in this collection are shown  
241 in **Figure 6**, and the results for insignificant term enrichment for other collections and databases can be  
242 found in **Supplementary Material 3**.

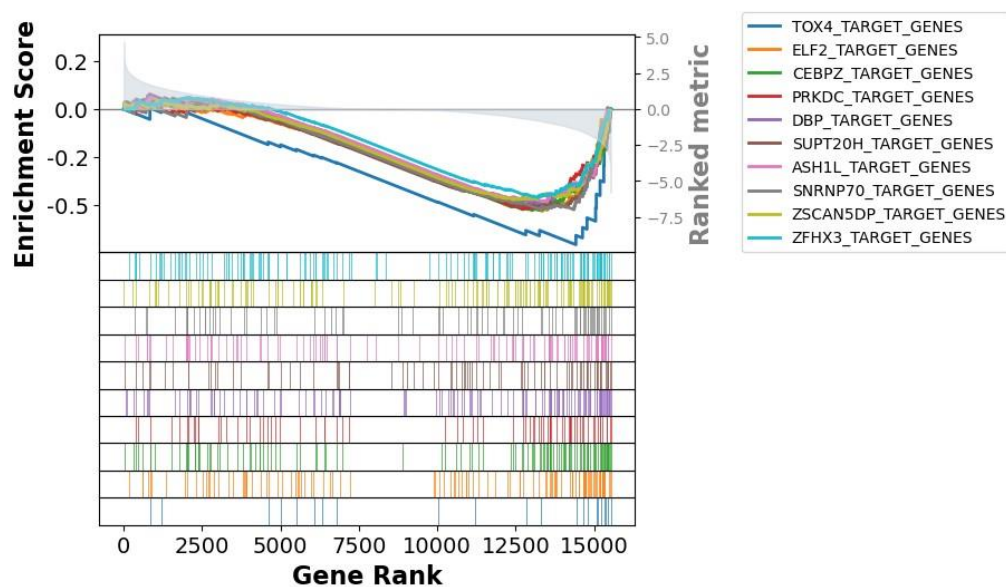

243 **Figure 6.** GSEA of lncRNA data. Terms are more significantly enriched with downregulated genes.  
244

### 245 3.4. ML model prediction of PC metastatic potential according to lncRNA gene 246 expression

247 Following the training and testing of each of the ML models, optimizations were performed to find  
248 the highest possible accuracy obtainable while reducing bias. Therefore, SMOTE was implemented in all



249 the ML algorithms. Reducing sample imbalances improved the predictive accuracy of the utilized  
 250 algorithms.

251 Following SMOTE implementation and thorough hyperparameter tuning, LR demonstrated an  
 252 accuracy score of 73.91% when distinguishing between TMAs and TWAs when tested, as well as an F1  
 253 score of 82.57% and a recall of 90.63%. Regardless, the area under the curve (AUC) for LR was 0.63, which  
 254 was relatively low. **Figure 7 A and B** show the receiver operating characteristic (ROC) curve and for logistic  
 255 regression following the implementation of SMOTE and the precision-recall (PR) curve. **C** shows the weight  
 256 of each lncRNA (feature) in assisting the regression

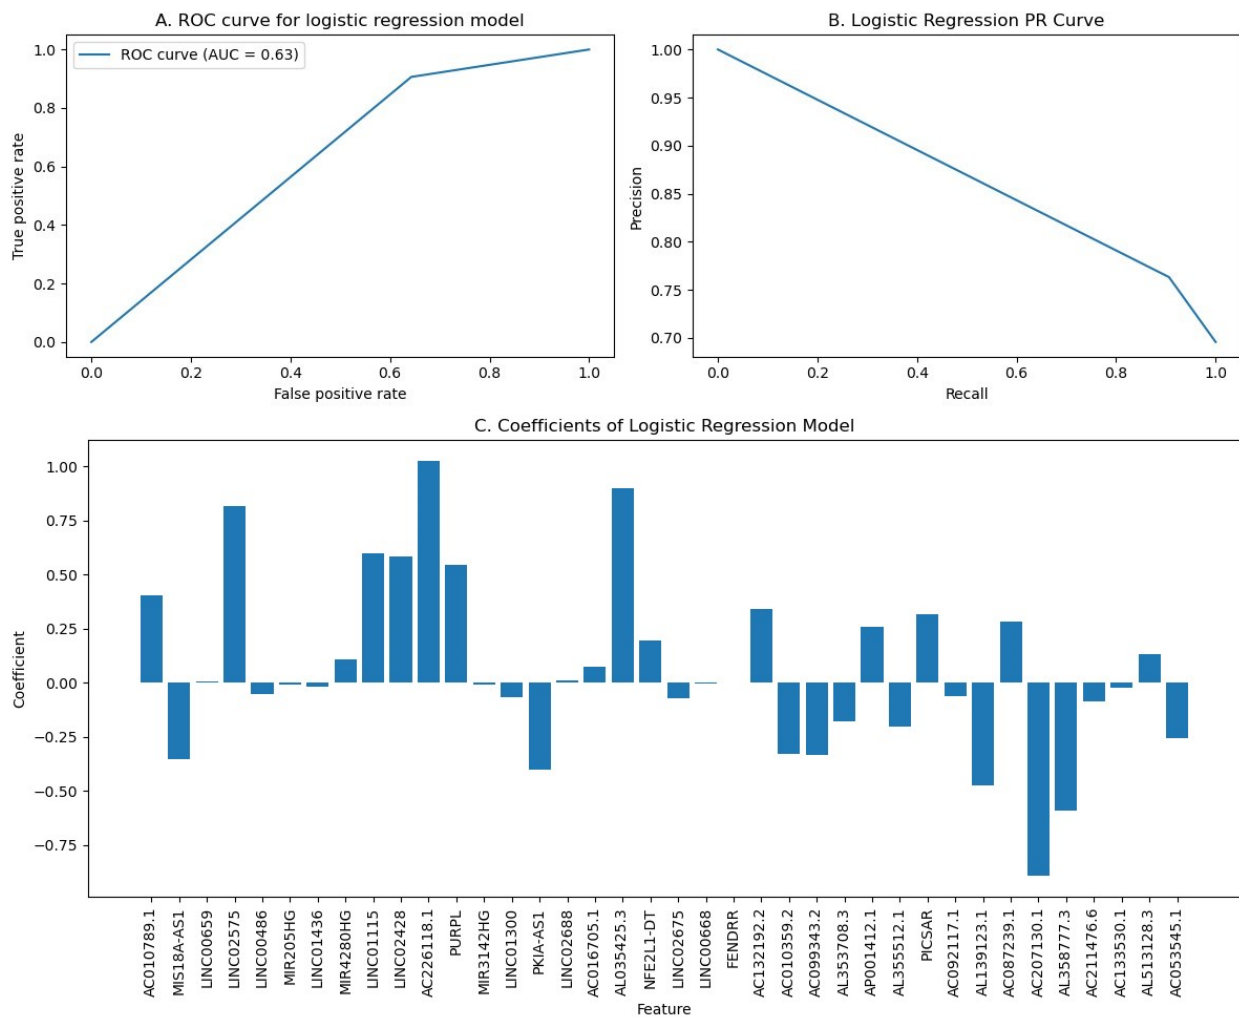

257

258 **Fig.7 A.** The LR model showed an AUC = 0.63, demonstrating relatively weak classification performance,  
259 despite the good accuracy of detecting PC cases at TNM stage IIb or above. **B.** LR model accuracy of  
260 predicting positive values in comparison to the true positive rate (recall). **C.** Weights of each of the  
261 differentially expressed lncRNAs allowing the LR model to differentiate between nonmetastatic tumors  
262 and metastatic tumors.

263 For the SVM model, SMOTE implementation, and hyperparameter tuning also improved the predictive  
264 potential of the algorithm, which, on testing, returned an accuracy of 76.09%, with a true positive rate of  
265 84.51% and a recall of 93.75%. **Figure A and B** show the ROC curve as well as the PR curve of the SVM  
266 model.

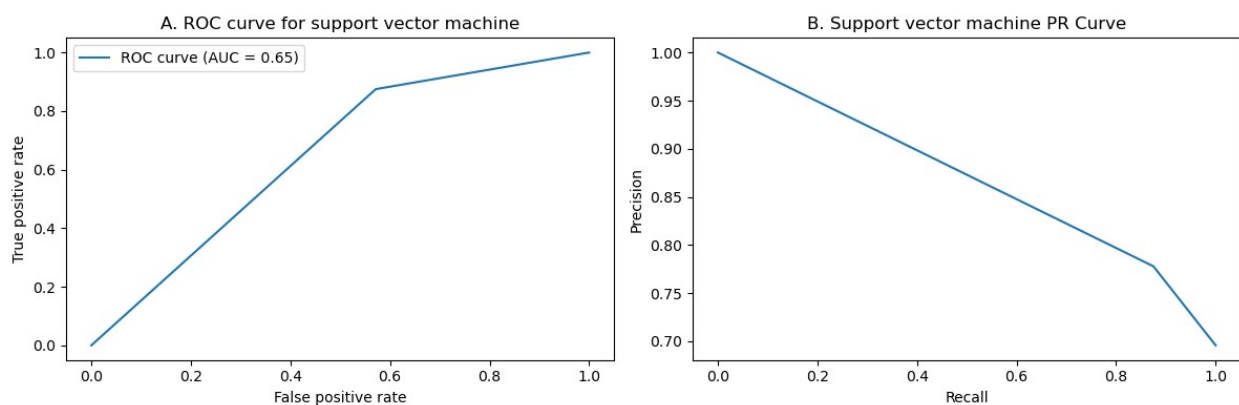

267  
268 **Fig. 8 A.** The SVM algorithm showed an AUC = 0.65, demonstrating modest accuracy of detecting PC  
269 cases at TNM stage IIb or above and distinguishing them from less metastatic stages. **B.** SVM model  
270 accuracy of predicting positive values in comparison to its recall capacity.

271 RFC was one of the most accurate models; after hyperparameter tuning, it returned an accuracy of  
272 76.09% and an F1 score of 81.96%, with a recall of 78.13%. Most importantly, the AUC for this model was  
273 0.75, showing good performance in classifying the tumors. Regardless, the gene panel consisting of 38  
274 genes allowed the ML algorithms to discern advanced TNM stages from relatively early TNM stages in PC.  
275 **Figure 9 A and B** also show the RFC model accuracy and PR curve.

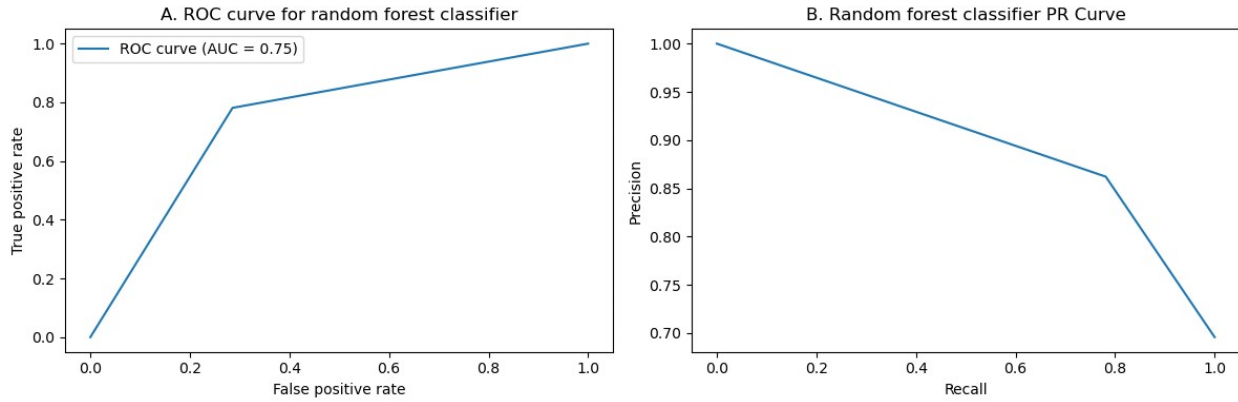

276

277 **Fig.9 A.** The RFC ROC AUC was 0.75, demonstrating acceptable accuracy of detecting PC cases among  
278 the other ML algorithms when using the differentially expressed lncRNA counts data, regardless of  
279 hyperparameter tuning. **B.** The RFC PR curve showed good recall, albeit with low precision.

280 As for XGBC, the model showed 71.73% accuracy; This specific model had the most inconsistency in  
281 predicting tumor types following each randomization. **Figure 10 A and B** show the low AUC and its PR  
282 curve. Data regarding the evaluation of the ML algorithms are available in **Supplementary Material 4.**

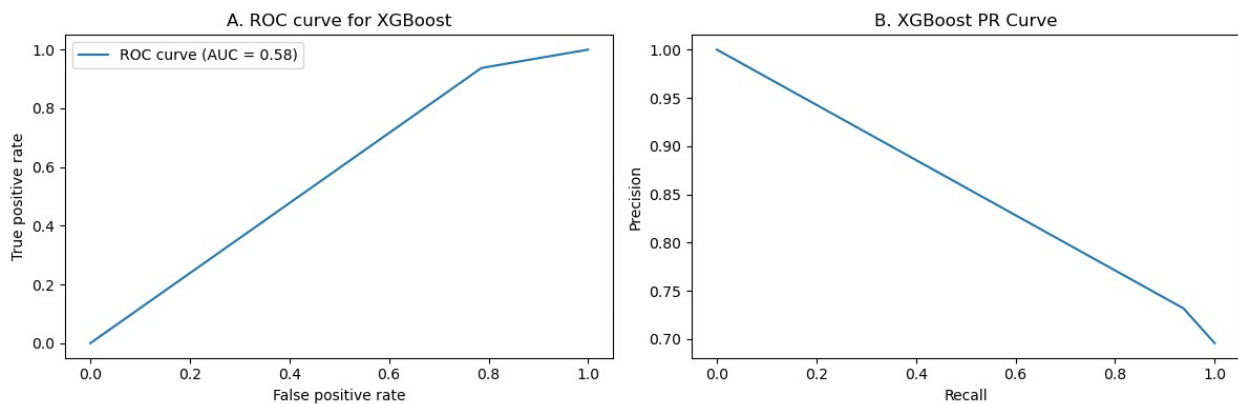

283

## 284 4. Discussion

285 Despite advances in diagnostics and therapeutics, PC remains a very challenging condition to treat,  
286 with consistently high mortality rates and limited available treatments<sup>37,38</sup>. Recently, research has focused  
287 on identifying prognostic markers for PC, and preclinical studies have identified several prognostic lncRNA

288 signatures<sup>8,39-41</sup>. LncRNAs have been further suggested to have implications in diagnosis, drug resistance,  
289 and therapeutics in PC<sup>4</sup>. However, as most patients are often diagnosed at advanced stages of disease,  
290 mutational burdens show complex relationships with lncRNA regulation<sup>4</sup>. Therefore, as the literature  
291 suggests, these relationships must be investigated to adjust treatment modalities. This becomes even  
292 more crucial in the latter stages of PC.

293 This study aimed to provide details regarding DEGs in PC first and then to further analyze differentially  
294 expressed lncRNA and assess the diagnostic potential of these lncRNAs during the transition from stage  
295 Ila and stage Iib and above. These lncRNAs were extracted after performing DGEA to extract 38 gene  
296 transcripts from the global RNA-seq gene panel among 151 patient samples. The diagnostic potential of  
297 lncRNAs was assessed using supervised ML techniques to predict metastatic transition. I employed four  
298 ML techniques with established accuracy in prediction: LR<sup>42</sup>, SVM<sup>43</sup>, RFC<sup>43</sup> and XBGC<sup>44</sup>.

299 DGEA of the global gene panel revealed 125 DEGs, many of which were previously uninvestigated. Of  
300 the downregulated DEGs, ADH7 was hypothesized to have implications when mutated in pancreatic  
301 injury<sup>45</sup>. NTS was also associated with PC<sup>46</sup>. However, SERPINB13 and MIR205HG were previously  
302 unexplored in PC but had been discussed in other cancers and were implicated in poor clinical  
303 outcomes<sup>47,48</sup>. No studies are available regarding LINC01300, which warrants further investigation. For the  
304 upregulated DEGs, PAX7 was previously reported to have some relationship with cancers, yet studies  
305 regarding this specific gene transcript are lacking<sup>49</sup>. For DEFA6 and DEFA5, a report suggested a link  
306 between them and clinical outcomes in colorectal cancer<sup>50</sup>. While there were no studies regarding  
307 AC010789.1 and TMPRSS15 in PC, some studies linked the potential implications of these genes with other  
308 cancers<sup>51,52</sup>.

309 GSEA for the global gene panel revealed several enriched pathways. For example, GO enrichment  
310 revealed that the gene panel significantly enriched pathways relevant in the regulation of aerobic

311 respiration (GO:1903715), electron transport carrier chain (GO:0022900), and mitochondrial gene  
312 expression and translation into RNA transcripts (GO:0140053). Notably, of the miRTarBase enriched  
313 pathways, mir-30b-5p microRNA (miRNA) was previously linked to PC<sup>53,54</sup>. While miR-548x-3p has not  
314 been studied regarding its function in cancer, miR-144-3p was previously implicated in PC<sup>55,56</sup>.  
315 Additionally, mir-548j-3p had no studies documenting its relationship with cancer. For miR-1468-3p,  
316 some studies have suggested it as a biomarker for non-small cell lung cancer and prostate cancer<sup>57,58</sup>.

317 Following the filtering of the global RNA-seq gene panel to lncRNAs exclusively, DGEA revealed 38  
318 differentially expressed lncRNAs, many of which were novel. LINC01300 and MIR205HG, as previously  
319 described, in addition to DUSP5-DT and AL513128.3, had no studies in PC, with the latter two lacking any  
320 studies on which. In contrast, one report regarding AC132192.2 indicated its relevance in prostate  
321 cancer<sup>59</sup>. For the upregulated lncRNAs, AC010789.1, as previously stated, had a report regarding its  
322 function in colorectal cancer<sup>52,60</sup>. LINC00486, RF00019, LINC01115, and AC133530.1 all lack validation  
323 studies in PC, but other reports indicate involvement in several diseases, including cancer<sup>61-64</sup>.

324 As these novel lncRNAs lack studies regarding their functions, GSEA of the selected MSigDB collections  
325 returned no significant enrichment but in one transcription factor collection. Notably, the most enriched  
326 pathway described genes containing one or more binding regions for a transcription factor that regulates  
327 cell fate and controls cell cycle progression from the mitotic phase to interphase, known as TOX high  
328 mobility group box family member 4 (TOX4)<sup>65,66</sup>. Interestingly, lncRNAs enriching this path were primarily  
329 downregulated.

330 To further explore the significance of the identified 38 lncRNAs, ML algorithms were employed to  
331 predict the metastatic state of cancer (designated “0” for stages IIa or below and “1” for stages IIb and  
332 above). Of all the algorithms, RFC showed superior accuracy to the other algorithms, showing an AUC of  
333 0.75 and an accuracy of over 76%. While there is much to be understood regarding the functions of the

334 identified lncRNA panel, the accuracy shown by RFC reveals important aspects about the involvement of  
335 these lncRNAs in PC. This finding warrants further *in vitro* and *in vivo* investigations.

336 For most of the identified lncRNA panels, this was the first study to uncover their involvement in PC.  
337 Regardless, there are many clinical implications for the findings discussed here. The results of this study  
338 suggest that the identified lncRNAs could be further utilized to assess the metastatic potential of PC, as  
339 well as aid in drug development, since these lncRNAs can be used as drug targets. Since their involvement  
340 allowed the prediction and distinction between TNM stages, further investigation of their functions seems  
341 crucial.

342 Despite the significant findings, this study is not without limitations. First, DEGA was performed for a  
343 large number of data, which likely raised data noise. Second, TWAs used as controls were low in number,  
344 as most samples had a stage IIb diagnosis, and SMOTE was necessary to utilize for the ML algorithms to  
345 reduce bias. Third, there was a lack of normal tissue control samples, which makes it difficult to provide  
346 more accurate assessments of the nature of these genes. Last, there might have been biases in the TCGA  
347 data from incorrect measurements or sequencing, potentially skewing the results of the RNA-seq data. All  
348 of these findings indicate that the findings of this study should be further validated and interpreted with  
349 caution.

350 Regardless, the presence of evidence regarding some of the identified novel lncRNAs indicates the  
351 strength of the rigorous methods used in this study. This further adds to the implications of the findings  
352 discussed here and the importance of future research to address these novel lncRNAs as potential markers  
353 of metastatic progression in PC.

## 354 5. Conclusion

355 DGEA utilized in this study identified a set of 38 novel lncRNAs that could contribute to metastatic  
356 progression in PC. GSEA was unable to provide sufficient information to further describe the functions of  
357 these lncRNA, due to the scarcity of available data relevant to the genes identified. Since different ML  
358 algorithms were able to predict metastatic PC with acceptable accuracy and the RFC model predicted PC  
359 with 76% accuracy based on the 38 lncRNA DEG panel, it is likely that these genes participate in the  
360 metastatic progression of PC, warranting further investigation.

361 The significance and importance of this study is represented by the identified novel lncRNA gene set.  
362 Metastatic PC lacks sufficient studies regarding the involvement of lncRNAs in tumor proliferation and  
363 progression, especially those that use ML algorithms with proven accuracy. This is the first study of its  
364 kind to use this methodology to reveal the discussed gene set in PC to distinguish between early-stage  
365 and advanced PC. Regardless, more studies are needed to identify the role these genes play in PC  
366 metastasis and other cancers.

367 Based on the findings of this study, I suggest further research to take place into the role of these  
368 genes. *In vitro* and *in vivo* experiments must be conducted to further elucidate the functions these genes  
369 may take part in. The accuracy of the ML algorithms to determine PC metastatic potential reveals that  
370 these genes could be added to diagnostic methods if their clinical manifestations are confirmed by future  
371 studies.

372        **6. Data availability statement**

373        All raw data acquired from TCGA, in addition to all analyses performed on said data and source code

374        utilized to perform the analyses mentioned in the methodology, are available at the link

375        <https://github.com/hasanalsharoh/PanC>.



## 376 7. References

- 377 1. Hu, J.X., Zhao, C.F., Chen, W.B., Liu, Q.C., Li, Q.W., Lin, Y.Y., and Gao, F. (2021). Pancreatic  
378 cancer: A review of epidemiology, trend, and risk factors. *World J Gastroenterol* 27, 4298-4321.  
379 [10.3748/wjg.v27.i27.4298](https://doi.org/10.3748/wjg.v27.i27.4298).
- 380 2. Partyka, O., Pajewska, M., Kwaśniewska, D., Czerw, A., Deptała, A., Budzik, M., Cipora, E., Gąska,  
381 I., Gazdowicz, L., Mielnik, A., et al. (2023). Overview of Pancreatic Cancer Epidemiology in Europe and  
382 Recommendations for Screening in High-Risk Populations. *Cancers* 15. [10.3390/cancers15143634](https://doi.org/10.3390/cancers15143634).
- 383 3. Andersson, R., Haglund, C., Seppänen, H., and Ansari, D. (2022). Pancreatic cancer – the past,  
384 the present, and the future. *Scandinavian Journal of Gastroenterology* 57, 1169-1177.  
385 [10.1080/00365521.2022.2067786](https://doi.org/10.1080/00365521.2022.2067786).
- 386 4. Bin, W., Yuan, C., Qie, Y., and Dang, S. (2023). Long non-coding RNAs and pancreatic cancer: A  
387 multifaceted view. *Biomedicine & Pharmacotherapy* 167, 115601.  
388 <https://doi.org/10.1016/j.biopha.2023.115601>.
- 389 5. Guttman, M., Amit, I., Garber, M., French, C., Lin, M.F., Feldser, D., Huarte, M., Zuk, O., Carey,  
390 B.W., Cassady, J.P., et al. (2009). Chromatin signature reveals over a thousand highly conserved large  
391 non-coding RNAs in mammals. *Nature* 458, 223-227. [10.1038/nature07672](https://doi.org/10.1038/nature07672).
- 392 6. Kore, H., Datta, K.K., Nagaraj, S.H., and Gowda, H. (2023). Protein-coding potential of non-  
393 canonical open reading frames in human transcriptome. *Biochem Biophys Res Commun* 684, 149040.  
394 [10.1016/j.bbrc.2023.09.068](https://doi.org/10.1016/j.bbrc.2023.09.068).
- 395 7. Aswathy, R., and Sumathi, S. (2023). Defining new biomarkers for overcoming therapeutical  
396 resistance in cervical cancer using lncRNA. *Mol Biol Rep*. [10.1007/s11033-023-08864-w](https://doi.org/10.1007/s11033-023-08864-w).

- 397 8. Zhang, N., Yu, X., Sun, H., Zhao, Y., Wu, J., and Liu, G. (2023). A prognostic and immunotherapy  
398 effectiveness model for pancreatic adenocarcinoma based on cuproptosis-related lncRNAs signature.  
399 *Medicine (Baltimore)* 102, e35167. [10.1097/md.00000000000035167](https://doi.org/10.1097/md.00000000000035167).
- 400 9. Wang, T., Ji, M., Liu, W., and Sun, J. (2023). Development and validation of a novel DNA damage  
401 repair-related long non-coding RNA signature in predicting prognosis, immunity, and drug sensitivity in  
402 uterine corpus endometrial carcinoma. *Comput Struct Biotechnol J* 21, 4944-4959.  
403 [10.1016/j.csbj.2023.10.025](https://doi.org/10.1016/j.csbj.2023.10.025).
- 404 10. Zhao, Y., Song, Y., Zhang, Y., Ji, M., Hou, P., and Sui, F. (2023). Screening protective miRNAs and  
405 constructing novel lncRNAs/miRNAs/mRNAs networks and prognostic models for triple-negative breast  
406 cancer. *Mol Cell Probes* 72, 101940. [10.1016/j.mcp.2023.101940](https://doi.org/10.1016/j.mcp.2023.101940).
- 407 11. Collins, G.S., Whittle, R., Bullock, G.S., Logullo, P., Dhiman, P., de Beyer, J.A., Riley, R.D., and  
408 Schlüssel, M.M. (2023). OPEN SCIENCE PRACTICES NEED SUBSTANTIAL IMPROVEMENT IN PROGNOSTIC  
409 MODEL STUDIES IN ONCOLOGY USING MACHINE LEARNING. *J Clin Epidemiol*.  
410 [10.1016/j.jclinepi.2023.10.015](https://doi.org/10.1016/j.jclinepi.2023.10.015).
- 411 12. Rasti, P., Wolf, C., Dorez, H., Sablong, R., Moussata, D., Samiei, S., and Rousseau, D. (2019).  
412 Machine Learning-Based Classification of the Health State of Mice Colon in Cancer Study from Confocal  
413 Laser Endomicroscopy. *Sci Rep* 9, 20010. [10.1038/s41598-019-56583-9](https://doi.org/10.1038/s41598-019-56583-9).
- 414 13. Sharma, A.N., Shwe, S., and Mesinkovska, N.A. (2022). Current state of machine learning for  
415 non-melanoma skin cancer. *Arch Dermatol Res* 314, 325-327. [10.1007/s00403-021-02236-9](https://doi.org/10.1007/s00403-021-02236-9).
- 416 14. Anaconda (2016). (Anaconda Software Distribution).
- 417 15. Kluyver, T., Ragan-Kelley, B., Pérez, F., Granger, B., Bussonnier, M., Frederic, J., Kelley, K.,  
418 Hamrick, J., Grout, J., Corlay, S., et al. (2016). Jupyter Notebooks – a publishing format for reproducible

- 419 computational workflows. In *Positioning and Power in Academic Publishing: Players, Agents and*  
420 *Agendas*, (IOS Press), pp. 87-90. [10.3233/978-1-61499-649-1-87](https://doi.org/10.3233/978-1-61499-649-1-87).
- 421 16. glob — Unix style pathname pattern expansion. (2023).
- 422 17. team, T.p.d. (2023). *pandas-dev/pandas*: Pandas.
- 423 18. Harris, C.R., Millman, K.J., van der Walt, S.J., Gommers, R., Virtanen, P., Cournapeau, D., Wieser,  
424 E., Taylor, J., Berg, S., Smith, N.J., et al. (2020). Array programming with NumPy. *Nature* *585*, 357-362.  
425 [10.1038/s41586-020-2649-2](https://doi.org/10.1038/s41586-020-2649-2).
- 426 19. Virtanen, P., Gommers, R., Oliphant, T.E., Haberland, M., Reddy, T., Cournapeau, D., Burovski, E.,  
427 Peterson, P., Weckesser, W., Bright, J., et al. (2020). SciPy 1.0: fundamental algorithms for scientific  
428 computing in Python. *Nature Methods* *17*, 261-272. [10.1038/s41592-019-0686-2](https://doi.org/10.1038/s41592-019-0686-2).
- 429 20. Boris, M., Maria, T., Vincent, C., and Mathieu, A. (2022). PyDESeq2: a python package for bulk  
430 RNA-seq differential expression analysis. *bioRxiv*, 2022.2012.2014.520412. [10.1101/2022.12.14.520412](https://doi.org/10.1101/2022.12.14.520412).
- 431 21. Hunter, J.D. (2007). Matplotlib: A 2D Graphics Environment. *Computing in Science & Engineering*  
432 *9*, 90-95. [10.1109/MCSE.2007.55](https://doi.org/10.1109/MCSE.2007.55).
- 433 22. Waskom, M.L. (2021). seaborn: statistical data visualization. *Journal of Open Source Software* *6*,  
434 3021. [10.21105/joss.03021](https://doi.org/10.21105/joss.03021).
- 435 23. Sanborn, M. (2023). *sanbomics*.
- 436 24. Seabold, S., and Perktold, J. (2010). Statsmodels: Econometric and statistical modeling with  
437 python. In 61. (Austin, TX), pp. 10-25080.
- 438 25. Love, M.I., Huber, W., and Anders, S. (2014). Moderated estimation of fold change and  
439 dispersion for RNA-seq data with DESeq2. *Genome biology* *15*, 1-21.

- 440 26. Zhao, Y., Li, M.-C., Konaté, M.M., Chen, L., Das, B., Karlovich, C., Williams, P.M., Evrard, Y.A.,  
441 Doroshow, J.H., and McShane, L.M. (2021). TPM, FPKM, or Normalized Counts? A Comparative Study of  
442 Quantification Measures for the Analysis of RNA-seq Data from the NCI Patient-Derived Models  
443 Repository. *Journal of Translational Medicine* 19, 269. [10.1186/s12967-021-02936-w](https://doi.org/10.1186/s12967-021-02936-w).
- 444 27. Subramanian, A., Tamayo, P., Mootha, V.K., Mukherjee, S., Ebert, B.L., Gillette, M.A., Paulovich,  
445 A., Pomeroy, S.L., Golub, T.R., Lander, E.S., and Mesirov, J.P. (2005). Gene set enrichment analysis: A  
446 knowledge-based approach for interpreting genome-wide expression profiles. *Proceedings of the  
447 National Academy of Sciences* 102, 15545-15550. [10.1073/pnas.0506580102](https://doi.org/10.1073/pnas.0506580102).
- 448 28. Fang, Z., Liu, X., and Peltz, G. (2023). GSEApY: a comprehensive package for performing gene set  
449 enrichment analysis in Python. *Bioinformatics* 39, btac757. [10.1093/bioinformatics/btac757](https://doi.org/10.1093/bioinformatics/btac757).
- 450 29. Chou, C.H., Shrestha, S., Yang, C.D., Chang, N.W., Lin, Y.L., Liao, K.W., Huang, W.C., Sun, T.H., Tu,  
451 S.J., Lee, W.H., et al. (2018). miRTarBase update 2018: a resource for experimentally validated  
452 microRNA-target interactions. *Nucleic Acids Res* 46, D296-d302. [10.1093/nar/gkx1067](https://doi.org/10.1093/nar/gkx1067).
- 453 30. The Gene Ontology, C., Aleksander, S.A., Balhoff, J., Carbon, S., Cherry, J.M., Drabkin, H.J., Ebert,  
454 D., Feuermann, M., Gaudet, P., Harris, N.L., et al. (2023). The Gene Ontology knowledgebase in 2023.  
455 *Genetics* 224, iyad031. [10.1093/genetics/iyad031](https://doi.org/10.1093/genetics/iyad031).
- 456 31. Ashburner, M., Ball, C.A., Blake, J.A., Botstein, D., Butler, H., Cherry, J.M., Davis, A.P., Dolinski, K.,  
457 Dwight, S.S., Eppig, J.T., et al. (2000). Gene Ontology: tool for the unification of biology. *Nature Genetics*  
458 25, 25-29. [10.1038/75556](https://doi.org/10.1038/75556).
- 459 32. Carbon, S., Ireland, A., Mungall, C.J., Shu, S., Marshall, B., Lewis, S., the Ami, G.O.H., and the  
460 Web Presence Working, G. (2009). AmiGO: online access to ontology and annotation data.  
461 *Bioinformatics* 25, 288-289. [10.1093/bioinformatics/btn615](https://doi.org/10.1093/bioinformatics/btn615).

- 462 33. Chawla, N.V., Bowyer, K.W., Hall, L.O., and Kegelmeyer, W.P. (2002). SMOTE: Synthetic Minority  
463 over-Sampling Technique. *J. Artif. Int. Res.* *16*, 321–357 , numpages = 337.
- 464 34. Garg, S., and Raghavan, B. (2023). Comparison of machine learning algorithms for the  
465 classification of spinal cord tumor. *Irish Journal of Medical Science (1971 -)*. [10.1007/s11845-023-03487-](https://doi.org/10.1007/s11845-023-03487-3)  
466 [3](https://doi.org/10.1007/s11845-023-03487-3).
- 467 35. Bruno, V., Betti, M., D'Ambrosio, L., Massacci, A., Chiofalo, B., Pietropolli, A., Piaggio, G.,  
468 Ciliberto, G., Nisticò, P., Pallocca, M., et al. (2023). Machine learning endometrial cancer risk prediction  
469 model: integrating guidelines of European Society for Medical Oncology with the tumor immune  
470 framework. *Int J Gynecol Cancer*. [10.1136/ijgc-2023-004671](https://doi.org/10.1136/ijgc-2023-004671).
- 471 36. Gutman, R., Aronson, D., Caspi, O., and Shalit, U. (2023). What drives performance in machine  
472 learning models for predicting heart failure outcome? *Eur Heart J Digit Health* *4*, 175-187.  
473 [10.1093/ehjdh/ztac054](https://doi.org/10.1093/ehjdh/ztac054).
- 474 37. Wall, N.R., Fuller, R.N., Morcos, A., and De Leon, M. (2023). Pancreatic Cancer Health Disparity:  
475 Pharmacologic Anthropology. *Cancers (Basel)* *15*. [10.3390/cancers15205070](https://doi.org/10.3390/cancers15205070).
- 476 38. de Jesus, V.H.F., Mathias-Machado, M.C., de Farias, J.P.F., Aruquipa, M.P.S., Jácome, A.A., and  
477 Peixoto, R.D. (2023). Targeting KRAS in Pancreatic Ductal Adenocarcinoma: The Long Road to Cure.  
478 *Cancers (Basel)* *15*. [10.3390/cancers15205015](https://doi.org/10.3390/cancers15205015).
- 479 39. Sun, Y., Yao, L., Man, C., Gao, Z., He, R., and Fan, Y. (2023). Development and validation of  
480 cuproptosis-related lncRNAs associated with pancreatic cancer immune microenvironment based on  
481 single-cell. *Front Immunol* *14*, 1220760. [10.3389/fimmu.2023.1220760](https://doi.org/10.3389/fimmu.2023.1220760).

- 482 40. Wang, H., Ding, Y., He, Y., Yu, Z., Zhou, Y., Gong, A., and Xu, M. (2023). LncRNA UCA1 promotes  
483 pancreatic cancer cell migration by regulating mitochondrial dynamics via the MAPK pathway. *Arch*  
484 *Biochem Biophys* 748, 109783. [10.1016/j.abb.2023.109783](https://doi.org/10.1016/j.abb.2023.109783).
- 485 41. Zhang, R., Wang, X., Ying, X., Huang, Y., Zhai, S., Shi, M., Tang, X., Liu, J., Shi, Y., Li, F., et al.  
486 (2023). Hypoxia-induced long non-coding RNA LINC00460 promotes p53 mediated proliferation and  
487 metastasis of pancreatic cancer by regulating the miR-4689/UBE2V1 axis and sequestering USP10. *Int J*  
488 *Med Sci* 20, 1339-1357. [10.7150/ijms.87833](https://doi.org/10.7150/ijms.87833).
- 489 42. Tsai, C.W., Chang, W.S., Yueh, T.C., Wang, Y.C., Chin, Y.T., Yang, M.D., Hung, Y.C., Mong, M.C.,  
490 Yang, Y.C., Gu, J., and Bau, D.T. (2023). The Significant Impacts of Interleukin-8 Genotypes on the Risk of  
491 Colorectal Cancer in Taiwan. *Cancers (Basel)* 15. [10.3390/cancers15204921](https://doi.org/10.3390/cancers15204921).
- 492 43. Earnest, A., Tesema, G.A., and Stirling, R.G. (2023). Machine Learning Techniques to Predict  
493 Timeliness of Care among Lung Cancer Patients. *Healthcare (Basel)* 11. [10.3390/healthcare11202756](https://doi.org/10.3390/healthcare11202756).
- 494 44. Padwal, M.K., Basu, S., and Basu, B. (2023). Application of Machine Learning in Predicting  
495 Hepatic Metastasis or Primary Site in Gastroenteropancreatic Neuroendocrine Tumors. *Current*  
496 *Oncology* 30, 9244-9261. [10.3390/curroncol30100668](https://doi.org/10.3390/curroncol30100668).
- 497 45. Chiang, C.P., Wu, C.W., Lee, S.P., Chung, C.C., Wang, C.W., Lee, S.L., Nieh, S., and Yin, S.J. (2009).  
498 Expression pattern, ethanol-metabolizing activities, and cellular localization of alcohol and aldehyde  
499 dehydrogenases in human pancreas: implications for pathogenesis of alcohol-induced pancreatic injury.  
500 *Alcohol Clin Exp Res* 33, 1059-1068. [10.1111/j.1530-0277.2009.00927.x](https://doi.org/10.1111/j.1530-0277.2009.00927.x).
- 501 46. Kanellopoulos, P., Nock, B.A., Krenning, E.P., and Maina, T. (2020). Optimizing the Profile of  
502 [(99m)Tc]Tc-NT(7-13) Tracers in Pancreatic Cancer Models by Means of Protease Inhibitors. *Int J Mol Sci*  
503 21. [10.3390/ijms21217926](https://doi.org/10.3390/ijms21217926).

- 504 47. de Koning, P.J., Bovenschen, N., Leusink, F.K., Broekhuizen, R., Quadir, R., van Gemert, J.T.,  
505 Hordijk, G.J., Chang, W.S., van der Tweel, I., Tilanus, M.G., and Kummer, J.A. (2009). Downregulation of  
506 SERPINB13 expression in head and neck squamous cell carcinomas associates with poor clinical  
507 outcome. *Int J Cancer* 125, 1542-1550. [10.1002/ijc.24507](https://doi.org/10.1002/ijc.24507).
- 508 48. Xu, Y., Yuan, C., Peng, J., Zhou, L., Lin, Y., Wang, Y., Zhang, J., Ma, J., Yin, W., and Lu, J. (2022).  
509 LncRNA MIR205HG expression predicts efficacy of neoadjuvant chemotherapy for patients with locally  
510 advanced breast cancer. *Genes Dis* 9, 837-840. [10.1016/j.gendis.2021.10.001](https://doi.org/10.1016/j.gendis.2021.10.001).
- 511 49. He, W.A., Berardi, E., Cardillo, V.M., Acharyya, S., Aulino, P., Thomas-Ahner, J., Wang, J.,  
512 Bloomston, M., Muscarella, P., Nau, P., et al. (2013). NF- $\kappa$ B-mediated Pax7 dysregulation in the muscle  
513 microenvironment promotes cancer cachexia. *J Clin Invest* 123, 4821-4835. [10.1172/jci68523](https://doi.org/10.1172/jci68523).
- 514 50. Zhao, X., Lu, M., Liu, Z., Zhang, M., Yuan, H., Dan, Z., Wang, D., Ma, B., Yang, Y., Yang, F., et al.  
515 (2022). Comprehensive analysis of alfa defensin expression and prognosis in human colorectal cancer.  
516 *Front Oncol* 12, 974654. [10.3389/fonc.2022.974654](https://doi.org/10.3389/fonc.2022.974654).
- 517 51. Sun, N.K., Huang, S.L., Lu, H.P., Chang, T.C., and Chao, C.C. (2015). Integrative transcriptomics-  
518 based identification of cryptic drivers of taxol-resistance genes in ovarian carcinoma cells: Analysis of the  
519 androgen receptor. *Oncotarget* 6, 27065-27082. [10.18632/oncotarget.4824](https://doi.org/10.18632/oncotarget.4824).
- 520 52. Duan, W., Kong, X., Li, J., Li, P., Zhao, Y., Liu, T., Binang, H.B., Wang, Y., Du, L., and Wang, C.  
521 (2020). LncRNA AC010789.1 Promotes Colorectal Cancer Progression by Targeting MicroRNA-432-  
522 3p/ZEB1 Axis and the Wnt/ $\beta$ -Catenin Signaling Pathway. *Front Cell Dev Biol* 8, 565355.  
523 [10.3389/fcell.2020.565355](https://doi.org/10.3389/fcell.2020.565355).
- 524 53. Liu, Y., Xu, G., and Li, L. (2021). LncRNA GATA3-AS1-miR-30b-5p-Tex10 axis modulates  
525 tumorigenesis in pancreatic cancer. *Oncol Rep* 45. [10.3892/or.2021.8010](https://doi.org/10.3892/or.2021.8010).

- 526 54. Chen, K., Wang, Q., Liu, X., Wang, F., Yang, Y., and Tian, X. (2022). Hypoxic pancreatic cancer  
527 derived exosomal miR-30b-5p promotes tumor angiogenesis by inhibiting GJA1 expression. *Int J Biol Sci*  
528 *18*, 1220-1237. [10.7150/ijbs.67675](https://doi.org/10.7150/ijbs.67675).
- 529 55. Liu, S., Luan, J., and Ding, Y. (2018). miR-144-3p Targets FosB Proto-oncogene, AP-1  
530 Transcription Factor Subunit (FOSB) to Suppress Proliferation, Migration, and Invasion of PANC-1  
531 Pancreatic Cancer Cells. *Oncol Res* *26*, 683-690. [10.3727/096504017x14982585511252](https://doi.org/10.3727/096504017x14982585511252).
- 532 56. Yang, J., Cong, X., Ren, M., Sun, H., Liu, T., Chen, G., Wang, Q., Li, Z., Yu, S., and Yang, Q. (2019).  
533 Circular RNA hsa\_circRNA\_0007334 is Predicted to Promote MMP7 and COL1A1 Expression by  
534 Functioning as a miRNA Sponge in Pancreatic Ductal Adenocarcinoma. *J Oncol* *2019*, 7630894.  
535 [10.1155/2019/7630894](https://doi.org/10.1155/2019/7630894).
- 536 57. Janpipatkul, K., Trachu, N., Watcharenwong, P., Panvongsa, W., Worakitchanon, W.,  
537 Metheetrairut, C., Oranratnachai, S., Reungwetwattana, T., and Chairoungdua, A. (2021). Exosomal  
538 microRNAs as potential biomarkers for osimertinib resistance of non-small cell lung cancer patients.  
539 *Cancer Biomark* *31*, 281-294. [10.3233/cbm-203075](https://doi.org/10.3233/cbm-203075).
- 540 58. Daniel, R., Wu, Q., Williams, V., Clark, G., Guruli, G., and Zehner, Z. (2017). A Panel of MicroRNAs  
541 as Diagnostic Biomarkers for the Identification of Prostate Cancer. *Int J Mol Sci* *18*.  
542 [10.3390/ijms18061281](https://doi.org/10.3390/ijms18061281).
- 543 59. Wang, K., Zhong, W., Long, Z., Guo, Y., Zhong, C., Yang, T., Wang, S., Lai, H., Lu, J., Zheng, P., and  
544 Mao, X. (2021). 5-Methylcytosine RNA Methyltransferases-Related Long Non-coding RNA to Develop  
545 and Validate Biochemical Recurrence Signature in Prostate Cancer. *Front Mol Biosci* *8*, 775304.  
546 [10.3389/fmolb.2021.775304](https://doi.org/10.3389/fmolb.2021.775304).



- 547 60. Li, R., Gao, X., Sun, H., Sun, L., and Hu, X. (2022). Expression characteristics of long non-coding  
548 RNA in colon adenocarcinoma and its potential value for judging the survival and prognosis of patients:  
549 bioinformatics analysis based on The Cancer Genome Atlas database. *J Gastrointest Oncol* 13, 1178-  
550 1187. [10.21037/jgo-22-384](https://doi.org/10.21037/jgo-22-384).
- 551 61. Zeng, X., Wang, Y., Liu, B., Rao, X., Cao, C., Peng, F., Zhi, W., Wu, P., Peng, T., Wei, Y., et al.  
552 (2023). Multi-omics data reveals novel impacts of human papillomavirus integration on the epigenomic  
553 and transcriptomic signatures of cervical tumorigenesis. *J Med Virol* 95, e28789. [10.1002/jmv.28789](https://doi.org/10.1002/jmv.28789).
- 554 62. Wang, W.F., Zhong, H.J., Cheng, S., Fu, D., Zhao, Y., Cai, H.M., Xiong, J., and Zhao, W.L. (2023). A  
555 nuclear NKRF interacting long noncoding RNA controls EBV eradication and suppresses tumor  
556 progression in natural killer/T-cell lymphoma. *Biochim Biophys Acta Mol Basis Dis* 1869, 166722.  
557 [10.1016/j.bbadis.2023.166722](https://doi.org/10.1016/j.bbadis.2023.166722).
- 558 63. Bi, X.-a., Li, L., Xu, R., and Xing, Z. (2021). Pathogenic Factors Identification of Brain Imaging and  
559 Gene in Late Mild Cognitive Impairment. *Interdisciplinary Sciences: Computational Life Sciences* 13, 511-  
560 520. [10.1007/s12539-021-00449-0](https://doi.org/10.1007/s12539-021-00449-0).
- 561 64. Gusev, F.E., Reshetov, D.A., Mitchell, A.C., Andreeva, T.V., Dincer, A., Grigorenko, A.P., Fedonin,  
562 G., Halene, T., Aliseychik, M., Filippova, E., et al. (2019). Chromatin profiling of cortical neurons identifies  
563 individual epigenetic signatures in schizophrenia. *Transl Psychiatry* 9, 256. [10.1038/s41398-019-0596-1](https://doi.org/10.1038/s41398-019-0596-1).
- 564 65. Yevshin, I., Sharipov, R., Kolmykov, S., Kondrakhin, Y., and Kolpakov, F. (2019). GTRD: a database  
565 on gene transcription regulation-2019 update. *Nucleic Acids Res* 47, D100-d105. [10.1093/nar/gky1128](https://doi.org/10.1093/nar/gky1128).
- 566 66. The UniProt, C. (2023). UniProt: the Universal Protein Knowledgebase in 2023. *Nucleic Acids*  
567 *Research* 51, D523-D531. [10.1093/nar/gkac1052](https://doi.org/10.1093/nar/gkac1052).
- 568
